# Supplementary material for: Determinants of B-Cell Compartment Hyperactivation in European Adolescents Living With Perinatally Acquired HIV-1 After Over 10 Years of Suppressive Therapy
Source: PubMed Central journal article supplement (PMC9009387; doi:10.3389/fimmu.2022.860418), 2022-03-31
Supplement: DataSheet_1.pdf [file DataSheet_1.pdf]

Supplementary Fig.1

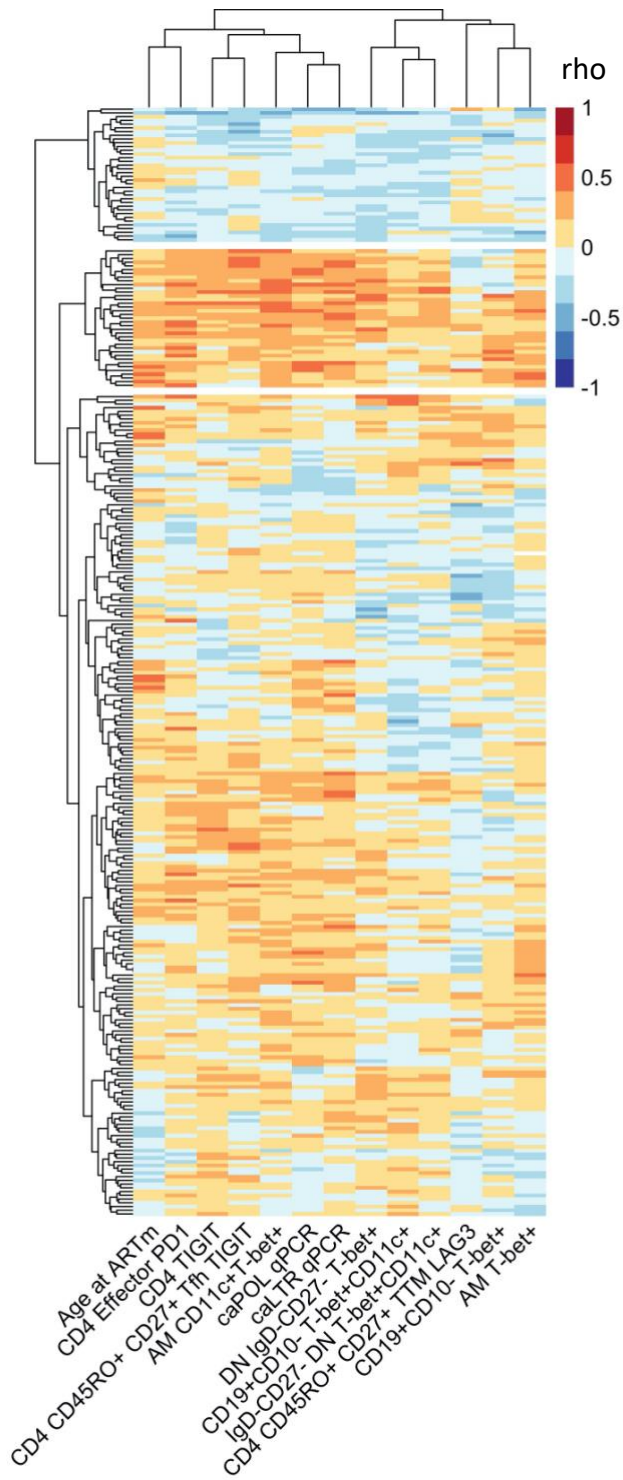

## Supplementary Table 1

| <b>P values</b>                                                               | CD19+CD10- T-<br>bet+CD11c+               | IgD-CD27- DN T-<br>bet+CD11c+           | AM CD11c+T-<br>bet+                       | DN IgD-CD27-<br>T-bet+                    | DN IgD-CD27- T-bet<br>expr                | AM T-bet<br>exp                                 | IgD-<br>CD27-                                        |
|-------------------------------------------------------------------------------|-------------------------------------------|-----------------------------------------|-------------------------------------------|-------------------------------------------|-------------------------------------------|-------------------------------------------------|------------------------------------------------------|
| CD4 CD45RO+ CD27+<br>TTM LAG3                                                 | 0.461785565                               | 0.004998415                             | 0.0109684                                 | 0.277308488                               | 0.021389135                               | 0.1921706<br>69                                 | 0.1867714<br>85                                      |
| CD4 CD69<br>CD4 CD45RO+ CD27+<br>TTM PDL1                                     | 0.919705883<br>0.743632288                | 0.046704979<br>0.032254947              | 0.01265367<br>0.022989327                 | 0.50690658<br>0.466388794                 | 0.187838184<br>0.08269117                 | 0.2110465<br>0.1691959<br>72                    | 0.9432487<br>9<br>0.0988059<br>57                    |
| CD4 TEM PDL1<br>CD4 CD45RO+ CD27+<br>Tfh PD1<br>CD4 Effector CD38-<br>HLA-DR- | 0.223082784<br>0.064706569<br>0.062731004 | 0.04300951<br>0.302856523<br>0.00775711 | 0.020614009<br>0.049687336<br>0.090184541 | 0.156102816<br>0.477797321<br>0.001422804 | 0.223748423<br>0.142906932<br>0.011897081 | 0.4078661<br>0.2330341<br>57<br>0.0792231<br>42 | 0.0999665<br>72<br>0.1527986<br>1<br>0.0338165<br>08 |
| CD4 Effector                                                                  | 0.023755404                               | 0.002439781                             | 0.0395915                                 | 0.002754557                               | 0.007045795                               | 0.0597532<br>48                                 | 0.0092922<br>35                                      |
| CD4 TIGIT<br>CD4 CD45RO+ CD27+<br>Tfh TIGIT                                   | 0.002732047<br>0.007941634                | 0.000279364<br>0.023878661              | 0.002070491<br>0.015329827                | 0.006341559<br>0.016272815                | 0.006323544<br>0.058745236                | 0.0077684<br>73<br>0.0316694<br>57              | 0.0089859<br>75<br>0.1227698<br>08                   |
| CD4 Effector PD1                                                              | 0.065957926                               | 0.039291289                             | 0.006647288                               | 0.000281472                               | 0.040581401                               | 0.0123648<br>55                                 | 0.0487804<br>52                                      |
| <b>rho</b>                                                                    | CD19+CD10- T-<br>bet+CD11c+               | IgD-CD27- DN T-<br>bet+CD11c+           | AM CD11c+T-<br>bet+                       | DN IgD-CD27-<br>T-bet+                    | DN IgD-CD27- T-bet<br>expr                | AM T-bet<br>exp                                 | IgD-<br>CD27-                                        |
| CD4 CD45RO+ CD27+<br>TTM LAG3                                                 | NS                                        | 0.457746034                             | 0.41902678                                | NS                                        | 0.382301836                               | NS                                              | NS                                                   |
| CD4 CD69<br>CD4 CD45RO+ CD27+<br>TTM PDL1                                     | NS<br>NS                                  | 0.343494538<br>0.357597999              | 0.423135697<br>0.378089601                | NS<br>NS                                  | NS<br>NS                                  | NS<br>NS                                        | NS<br>NS                                             |

|                    |             |             |             |             |             |           |           |
|--------------------|-------------|-------------|-------------|-------------|-------------|-----------|-----------|
| CD4 TEM PDL1       | NS          | 0.339168493 | 0.384437151 | NS          | NS          | NS        | NS        |
| CD4 CD45RO+ CD27+  |             |             |             |             |             |           |           |
| Tfh PD1            | NS          | NS          | 0.329535947 | NS          | NS          | NS        | NS        |
| CD4 Effector CD38- |             |             |             |             |             |           | 0.3546373 |
| HLA-DR-            | NS          | 0.436635137 | NS          | 0.511716235 | 0.414761426 | NS        | 24        |
|                    |             |             |             |             |             |           | 0.4275693 |
| CD4 Effector       | 0.376158602 | 0.489606797 | 0.344574591 | 0.484423279 | 0.441367838 | NS        | 43        |
|                    |             |             |             |             |             | 0.4365626 | 0.4292701 |
| CD4 TIGIT          | 0.484776313 | 0.570601112 | 0.496492245 | 0.446475701 | 0.44661263  | 01        | 8         |
| CD4 CD45RO+ CD27+  |             |             |             |             |             | 0.3587383 |           |
| Tfh TIGIT          | 0.435468298 | 0.375852751 | 0.401107036 | 0.397811394 | NS          | 34        | NS        |
|                    |             |             |             |             |             | 0.4127188 | 0.3307806 |
| CD4 Effector PD1   | NS          | 0.345067251 | 0.444201313 | 0.570352734 | 0.342971273 | 5         | 17        |

## Supplementary Table 2

### Reactome pathways - Performed on Negatively correlated proteins

| Term                                                                                | Adjusted.P.value | Proteins                                                       |
|-------------------------------------------------------------------------------------|------------------|----------------------------------------------------------------|
| Platelet degranulation Homo sapiens R-HSA-114608                                    | 6.88744E-08      | ITIH4, APOH, ITGA2B, SERPINF2, ALB, HRG, TLN1                  |
| Response to elevated platelet cytosolic Ca <sup>2+</sup> Homo sapiens R-HSA-76005   | 6.88744E-08      | ITIH4, APOH, ITGA2B, SERPINF2, ALB, HRG, TLN1                  |
| Hemostasis Homo sapiens R-HSA-109582                                                | 1.57513E-06      | ITIH4, APOH, ITGA2B, SERPINF2, ALB, HBB, HBD, HRG, TLN1, KLKB1 |
| Platelet activation, signaling and aggregation Homo sapiens R-HSA-76002             | 8.94125E-06      | ITIH4, APOH, ITGA2B, SERPINF2, ALB, HRG, TLN1                  |
| Erythrocytes take up oxygen and release carbon dioxide Homo sapiens R-HSA-1247673   | 8.94125E-06      | CA1, HBB, HBA1                                                 |
| Erythrocytes take up carbon dioxide and release oxygen Homo sapiens R-HSA-1237044   | 2.49667E-05      | CA1, HBB, HBA1                                                 |
| O <sub>2</sub> /CO <sub>2</sub> exchange in erythrocytes Homo sapiens R-HSA-1480926 | 2.49667E-05      | CA1, HBB, HBA1                                                 |
| Scavenging of heme from plasma Homo sapiens R-HSA-2168880                           | 2.56245E-05      | AMBP, ALB, HBB, HBA1                                           |
| Binding and Uptake of Ligands by Scavenger Receptors Homo sapiens R-HSA-2173782     | 0.000154953      | AMBP, ALB, HBB, HBA1                                           |
| Dissolution of Fibrin Clot Homo sapiens R-HSA-75205                                 | 0.003639893      | SERPINF2, HRG                                                  |

### Reactome pathways - Performed on Positively correlated proteins

| Term                                                                            | Adjusted.P.value | Proteins                                                       |
|---------------------------------------------------------------------------------|------------------|----------------------------------------------------------------|
| Complement cascade Homo sapiens R-HSA-166658                                    | 1.6472E-12       | IGLV4-69, C5, CFI, IGLV2-23, C4BPA, IGLC2, CLU, CFB, IGLV10-54 |
| Scavenging of heme from plasma Homo sapiens R-HSA-2168880                       | 1.02257E-08      | IGLV4-69, IGLV2-23, HPR, IGLC2, APOL1, IGLV10-54               |
| Binding and Uptake of Ligands by Scavenger Receptors Homo sapiens R-HSA-2173782 | 1.29901E-07      | IGLV4-69, IGLV2-23, HPR, IGLC2, APOL1, IGLV10-54               |
| Initial triggering of complement Homo sapiens R-HSA-166663                      | 1.53583E-06      | IGLV4-69, IGLV2-23, IGLC2, CFB, IGLV10-54                      |
| Regulation of Complement cascade Homo sapiens R-HSA-977606                      | 2.53246E-06      | C5, CFI, C4BPA, CFB                                            |
| Classical antibody-mediated complement activation Homo sapiens R-HSA-173623     | 1.70347E-05      | IGLV4-69, IGLV2-23, IGLC2, IGLV10-54                           |
| FCGR activation Homo sapiens R-HSA-2029481                                      | 2.17615E-05      | IGLV4-69, IGLV2-23, IGLC2, IGLV10-54                           |
| Creation of C4 and C2 activators Homo sapiens R-HSA-166786                      | 2.17615E-05      | IGLV4-69, IGLV2-23, IGLC2, IGLV10-54                           |
| Role of phospholipids in phagocytosis Homo sapiens R-HSA-2029485                | 4.38779E-05      | IGLV4-69, IGLV2-23, IGLC2, IGLV10-54                           |
| FCERI mediated Ca <sup>2+</sup> mobilization Homo sapiens R-HSA-2871809         | 4.50569E-05      | IGLV4-69, IGLV2-23, IGLC2, IGLV10-54                           |

### GO Biological Process - Performed on Negatively correlated proteins

| Term                                                  | Adjusted.P.value | Proteins                                              |
|-------------------------------------------------------|------------------|-------------------------------------------------------|
| platelet degranulation (GO:0002576)                   | 1.58619E-08      | ITIH4, APOH, ITGA2B, SERPINF2, ALB, TAGLN2, HRG, TLN1 |
| regulated exocytosis (GO:0045055)                     | 3.29263E-08      | ITIH4, APOH, ITGA2B, SERPINF2, ALB, TAGLN2, HRG, TLN1 |
| negative regulation of blood coagulation (GO:0030195) | 5.44959E-07      | VTN, APOH, SERPINF2, HRG, KLKB1                       |
| regulation of fibrinolysis (GO:0051917)               | 5.44959E-07      | APOH, SERPINF2, HRG, KLKB1                            |
| negative regulation of fibrinolysis (GO:0051918)      | 3.11665E-05      | APOH, SERPINF2, HRG                                   |
| receptor-mediated endocytosis (GO:0006898)            | 5.70694E-05      | AMBP, IGKV1-17, ALB, IGHV3-13, HBB, HBA1              |
| hydrogen peroxide catabolic process (GO:0042744)      | 9.58743E-05      | HBB, APOA4, HBA1                                      |
| positive regulation of blood coagulation (GO:0030194) | 0.000221947      | APOH, SERPINF2, HRG                                   |
| hydrogen peroxide metabolic process (GO:0042743)      | 0.000231815      | HBB, APOA4, HBA1                                      |
| endocytosis (GO:0006897)                              | 0.000238417      | AMBP, IGKV1-17, ALB, IGHV3-13, HBB, HBA1              |

### GO Biological Process - Performed on Positively correlated proteins

| Term                                                                        | Adjusted.P.value | Proteins                                                                      |
|-----------------------------------------------------------------------------|------------------|-------------------------------------------------------------------------------|
| regulation of acute inflammatory response (GO:0002673)                      | 8.01976E-14      | APCS, C5, IGLV1-47, CFI, IGHV4-34, IGLV2-23, CFHR5, C4BPA, IGHV3-48, CLU, CFB |
| regulation of protein activation cascade (GO:2000257)                       | 6.35311E-13      | C5, IGLV1-47, CFI, IGHV4-34, IGLV2-23, CFHR5, C4BPA, IGHV3-48, CLU, CFB       |
| regulation of complement activation (GO:0030449)                            | 6.35311E-13      | C5, IGLV1-47, CFI, IGHV4-34, IGLV2-23, CFHR5, C4BPA, IGHV3-48, CLU, CFB       |
| regulation of humoral immune response (GO:0002920)                          | 6.35311E-13      | C5, IGLV1-47, CFI, IGHV4-34, IGLV2-23, CFHR5, C4BPA, IGHV3-48, CLU, CFB       |
| regulation of immune effector process (GO:0002697)                          | 6.35311E-13      | C5, IGLV1-47, CFI, IGHV4-34, IGLV2-23, CFHR5, C4BPA, IGHV3-48, CLU, CFB       |
| regulation of protein processing (GO:0070613)                               | 1.73448E-12      | C5, IGLV1-47, CFI, IGHV4-34, IGLV2-23, CFHR5, C4BPA, IGHV3-48, CLU, CFB       |
| complement activation, classical pathway (GO:0006958)                       | 3.30081E-09      | APCS, IGHV5-51, IGLV1-47, IGLL1, IGHV4-34, IGLV2-23, IGHV3-48, IGLC2          |
| humoral immune response mediated by circulating immunoglobulin (GO:0002455) | 3.30081E-09      | APCS, IGHV5-51, IGLV1-47, IGLL1, IGHV4-34, IGLV2-23, IGHV3-48, IGLC2          |
| receptor-mediated endocytosis (GO:0006898)                                  | 5.13899E-05      | IGLV1-47, IGHV4-34, IGLV2-23, IGHV3-48, HPR, APOL1                            |
| plasma membrane invagination (GO:0099024)                                   | 5.13899E-05      | IGHV5-51, GSN, IGLL1, IGHV3-48, IGLC2                                         |
